# Supplementary material for: Transcriptomic, Functional, and Network Analyses Reveal Novel Genes Involved in the Interaction Between Caenorhabditis elegans and Stenotrophomonas maltophilia
Source: Front Cell Infect Microbiol. 2018 Aug 20;8:266. doi: 10.3389/fcimb.2018.00266 (PMC6109753; doi:10.3389/fcimb.2018.00266)
Supplement: Supplementary file 2 [file Table_2.xlsx]

## Sheet: Caption-TableS2
Table S2: Pair-wise correlation coefficients for all C. elegans expression profile biological replicates. This correlation table was generated in GeneSpring 12 (Agilent Technologies) from quantile normalized data.

## Sheet: Table S2
	Treatment	JCMS	JCMS	JCMS	JCMS	K279a	K279a	K279a	K279a	OP50	OP50	OP50	OP50
Treatment	Array Name	556640A02	556640A04	556640A06	556640A11	556640A01	556640A07	556640A09	556640A10	556640A03	556640A05	556640A08	556640A12
JCMS	556640A02	1	0.969097	0.953834	0.972319	0.951724	0.931805	0.969587	0.93031	0.953146	0.927813	0.943268	0.870632
JCMS	556640A04	0.969097	1	0.948364	0.986427	0.96376	0.960066	0.954555	0.944903	0.96141	0.935111	0.955207	0.877638
JCMS	556640A06	0.953834	0.948364	1	0.951037	0.920209	0.935519	0.945728	0.914007	0.957181	0.897465	0.939925	0.832045
JCMS	556640A11	0.972319	0.986427	0.951037	1	0.949214	0.943122	0.966889	0.927214	0.949168	0.935007	0.949324	0.888803
K279a	556640A01	0.951724	0.96376	0.920209	0.949214	1	0.976861	0.959653	0.972877	0.943036	0.939926	0.96884	0.903752
K279a	556640A07	0.931805	0.960066	0.935519	0.943122	0.976861	1	0.948248	0.977537	0.956773	0.937448	0.966643	0.895598
K279a	556640A09	0.969587	0.954555	0.945728	0.966889	0.959653	0.948248	1	0.942298	0.949029	0.940619	0.952032	0.902569
K279a	556640A10	0.93031	0.944903	0.914007	0.927214	0.972877	0.977537	0.942298	1	0.95163	0.935079	0.961317	0.898212
OP50	556640A03	0.953146	0.96141	0.957181	0.949168	0.943036	0.956773	0.949029	0.95163	1	0.939331	0.958081	0.865648
OP50	556640A05	0.927813	0.935111	0.897465	0.935007	0.939926	0.937448	0.940619	0.935079	0.939331	1	0.943922	0.934594
OP50	556640A08	0.943268	0.955207	0.939925	0.949324	0.96884	0.966643	0.952032	0.961317	0.958081	0.943922	1	0.905863
OP50	556640A12	0.870632	0.877638	0.832045	0.888803	0.903752	0.895598	0.902569	0.898212	0.865648	0.934594	0.905863	1
