# Supplementary material for: Transcriptomic, Functional, and Network Analyses Reveal Novel Genes Involved in the Interaction Between Caenorhabditis elegans and Stenotrophomonas maltophilia
Source: Front Cell Infect Microbiol. 2018 Aug 20;8:266. doi: 10.3389/fcimb.2018.00266 (PMC6109753; doi:10.3389/fcimb.2018.00266)
Supplement: Supplementary file 4 [file Table_4.xlsx]

## Sheet: Caption-TableS4
Table S4: GO and TEA analysis of up and down regulated differentially expressed genes on S. maltophilia JCMS, K279a or E. coli OP50 The Wormbase ID numbers of all the differentially expressed genes were submitted to DAVID Bioinformatics Resources 6.8 for mapping. Nine up regulated genes and one down regulated gene were not mapped with annotations and these Wormbase ID numbers are listed in the “U…

## Sheet: DAVID
GO analysis of up regulated differentially expressed genes on S. maltophilia JCMS, K279a or E. coli OP50
Category	Term	Count	%	PValue	Genes	List Total	Pop Hits	Pop Total	Fold Enrichment	Bonferroni	Benjamini	FDR	Parent to
GOTERM_BP_ALL	GO:0045087~innate immune response	26	17.5676	2.12627e-23	WBGENE00008988, WBGENE00007097, WBGENE00009433, WBGENE00019660, WBGENE00013837, WBGENE00015455, WBGENE00015994, WBGENE00008631, WBGENE00018971, WBGENE00015574, WBGENE00000795, WBGENE00007717, WBGENE00009907, WBGENE00044457, WBGENE00007506, WBGENE00009914, WBGENE00021580, WBGENE00008577, WBGENE00010125, WBGENE00020579, WBGENE00022848, WBGENE00008900, WBGENE00003702, WBGENE00010658, WBGENE00019659,…	62	326	11627	14.9566	7.76087e-21	7.76087e-21	2.92619e-20
GOTERM_BP_ALL	GO:0006950~response to stress	28	18.9189	1.59426e-12	WBGENE00008988, WBGENE00008631, WBGENE00015994, WBGENE00018971, WBGENE00015574, WBGENE00007717, WBGENE00009907, WBGENE00007506, WBGENE00021580, WBGENE00022848, WBGENE00004053, WBGENE00013837, WBGENE00019660, WBGENE00009433, WBGENE00007097, WBGENE00015455, WBGENE00000795, WBGENE00018725, WBGENE00044457, WBGENE00009914, WBGENE00010125, WBGENE00008577, WBGENE00020579, WBGENE00008900, WBGENE00003702,…	62	1117	11627	4.7009	5.81912e-10	1.16382e-10	2.19407e-09	GO:0006952~defense response,
GOTERM_BP_ALL	GO:0050829~defense response to Gram-negative bacterium	6	4.05405	7.99878e-05	WBGENE00008988, WBGENE00010125, WBGENE00009433, WBGENE00020579, WBGENE00015574, WBGENE00003702	62	85	11627	13.2376	0.0287746	0.0048543	0.110024
GOTERM_BP_ALL	GO:0050896~response to stimulus	33	22.2973	0.000145402	WBGENE00008988, WBGENE00015994, WBGENE00008631, WBGENE00018971, WBGENE00015574, WBGENE00007717, WBGENE00009907, WBGENE00007506, WBGENE00021580, WBGENE00003650, WBGENE00022848, WBGENE00003713, WBGENE00004053, WBGENE00007097, WBGENE00013837, WBGENE00019660, WBGENE00009433, WBGENE00015455, WBGENE00018646, WBGENE00000795, WBGENE00018725, WBGENE00044457, WBGENE00009914, WBGENE00008577, WBGENE00010125,…	62	3437	11627	1.80057	0.0516917	0.00755355	0.199918	GO:0006950~response to stress, GO:0009607~response to biotic stimulus
GOTERM_CC_ALL	GO:0045121~membrane raft	7	4.72973	1.24568e-06	WBGENE00008988, WBGENE00019660, WBGENE00009433, WBGENE00007097, WBGENE00020579, WBGENE00019659, WBGENE00044457	55	74	11373	19.5604	7.97207e-05	7.97207e-05	0.00126549
GO analysis of down regulated differentially expressed genes on S. maltophilia JCMS, K279a or E. coli OP50
Category	Term	Count	%	PValue	Genes	List Total	Pop Hits	Pop Total	Fold Enrichment	Bonferroni	Benjamini	FDR	Parent to
GOTERM_BP_ALL	GO:0044710~single-organism metabolic process	39	16.5254	0.000162306	WBGENE00007073, WBGENE00007072, WBGENE00000372, WBGENE00008519, WBGENE00015369, WBGENE00011452, WBGENE00019473, WBGENE00012448, WBGENE00019376, WBGENE00001540, WBGENE00001547, WBGENE00010456, WBGENE00001500, WBGENE00011673, WBGENE00011699, WBGENE00020154, WBGENE00011671, WBGENE00010706, WBGENE00011672, WBGENE00010904, WBGENE00022076, WBGENE00003402, WBGENE00014254, WBGENE00044811, WBGENE00008167,…	149	1657	11627	1.83664	0.102612	0.0119576	0.242909	GO:0006063~uronic acid metabolic process
GOTERM_BP_ALL	GO:1902578~single-organism localization	35	14.8305	0.000696708	WBGENE00001586, WBGENE00004997, WBGENE00012137, WBGENE00018429, WBGENE00002233, WBGENE00017389, WBGENE00006669, WBGENE00000061, WBGENE00009799, WBGENE00001500, WBGENE00001616, WBGENE00000242, WBGENE00015333, WBGENE00013088, WBGENE00002260, WBGENE00000490, WBGENE00001612, WBGENE00006809, WBGENE00020004, WBGENE00000046, WBGENE00015632, WBGENE00006693, WBGENE00001374, WBGENE00009686, WBGENE00006664,…	149	1529	11627	1.78625	0.371781	0.0305158	1.03882	Grand parent to GO:0071804~cellular potassium ion transport
GOTERM_BP_ALL	GO:0098655~cation transmembrane transport	34	14.4068	0.00051839	WBGENE00001586, WBGENE00004997, WBGENE00012137, WBGENE00018429, WBGENE00002233, WBGENE00017389, WBGENE00006669, WBGENE00000061, WBGENE00009799, WBGENE00001500, WBGENE00001616, WBGENE00015333, WBGENE00013088, WBGENE00002260, WBGENE00000490, WBGENE00001612, WBGENE00006809, WBGENE00020004, WBGENE00000046, WBGENE00015632, WBGENE00006693, WBGENE00001374, WBGENE00009686, WBGENE00006664, WBGENE00014261,…	149	1443	11627	1.83863	0.292385	0.0244013	0.7739	GO:0071804~cellular potassium ion transport
GOTERM_BP_ALL	GO:0055085~transmembrane transport	30	12.7119	1.32278e-06	WBGENE00001586, WBGENE00004997, WBGENE00012137, WBGENE00018429, WBGENE00002233, WBGENE00017389, WBGENE00006669, WBGENE00000061, WBGENE00009799, WBGENE00001616, WBGENE00015333, WBGENE00013088, WBGENE00001612, WBGENE00006809, WBGENE00020004, WBGENE00000046, WBGENE00015632, WBGENE00006693, WBGENE00001374, WBGENE00009686, WBGENE00006664, WBGENE00000232, WBGENE00014261, WBGENE00013333, WBGENE00044107,…	149	870	11627	2.69081	0.000881906	0.000881906	0.00198192	GO:0034220~ion transmembrane transport
GOTERM_BP_ALL	GO:0006811~ion transport	27	11.4407	1.44447e-06	WBGENE00001586, WBGENE00012137, WBGENE00018429, WBGENE00002233, WBGENE00017389, WBGENE00006669, WBGENE00000061, WBGENE00009799, WBGENE00001500, WBGENE00001616, WBGENE00015333, WBGENE00013088, WBGENE00001612, WBGENE00006809, WBGENE00000046, WBGENE00006693, WBGENE00001374, WBGENE00006664, WBGENE00000232, WBGENE00014261, WBGENE00013333, WBGENE00044107, WBGENE00008570, WBGENE00021028, WBGENE00015288,…	149	728	11627	2.8941	0.000963	0.000481616	0.00216425	GO:0034220~ion transmembrane transport
GOTERM_BP_ALL	GO:0055114~oxidation-reduction process	24	10.1695	1.73666e-06	WBGENE00044811, WBGENE00000372, WBGENE00008519, WBGENE00012914, WBGENE00008167, WBGENE00019473, WBGENE00012448, WBGENE00018334, WBGENE00012407, WBGENE00015044, WBGENE00001500, WBGENE00019846, WBGENE00018393, WBGENE00011699, WBGENE00011673, WBGENE00020154, WBGENE00010706, WBGENE00011671, WBGENE00011672, WBGENE00017301, WBGENE00009110, WBGENE00022076, WBGENE00014254, WBGENE00011009	149	596	11627	3.14229	0.00115769	0.000386044	0.00260203
GOTERM_BP_ALL	GO:0034220~ion transmembrane transport	22	9.32203	1.86157e-06	WBGENE00001586, WBGENE00006809, WBGENE00012137, WBGENE00002233, WBGENE00000046, WBGENE00006693, WBGENE00017389, WBGENE00006669, WBGENE00009799, WBGENE00001374, WBGENE00000061, WBGENE00001616, WBGENE00006664, WBGENE00000232, WBGENE00014261, WBGENE00013333, WBGENE00044107, WBGENE00008570, WBGENE00015288, WBGENE00010278, WBGENE00019904, WBGENE00001612	149	510	11627	3.36615	0.0012409	0.000310369	0.00278917	GO:0098660~inorganic ion transmembrane transport, GO:0098655~cation transmembrane transport
GOTERM_BP_ALL	GO:0098660~inorganic ion transmembrane transport	17	7.20339	1.02357e-05	WBGENE00001586, WBGENE00012137, WBGENE00002233, WBGENE00006693, WBGENE00017389, WBGENE00006669, WBGENE00009799, WBGENE00001374, WBGENE00006664, WBGENE00000232, WBGENE00014261, WBGENE00013333, WBGENE00044107, WBGENE00008570, WBGENE00015288, WBGENE00010278, WBGENE00019904	149	352	11627	3.76867	0.00680402	0.00113723	0.0153352	GO:0098662~inorganic cation transmembrane transport
GOTERM_BP_ALL	GO:0006812~cation transport	17	7.20339	0.000121057	WBGENE00006809, WBGENE00012137, WBGENE00002233, WBGENE00000046, WBGENE00006693, WBGENE00006669, WBGENE00001374, WBGENE00001500, WBGENE00000061, WBGENE00006664, WBGENE00014261, WBGENE00013333, WBGENE00015333, WBGENE00044107, WBGENE00008570, WBGENE00010278, WBGENE00019904	149	432	11627	3.07076	0.0775759	0.010043	0.181228	GO:0030001~metal ion transport, GO:0015672~monovalent inorganic cation transport, GO:0098655~cation transmembrane transport
GOTERM_BP_ALL	GO:0030001~metal ion transport	15	6.35593	4.9065e-06	WBGENE00006809, WBGENE00012137, WBGENE00002233, WBGENE00006693, WBGENE00006669, WBGENE00001500, WBGENE00001374, WBGENE00006664, WBGENE00014261, WBGENE00013333, WBGENE00015333, WBGENE00044107, WBGENE00008570, WBGENE00010278, WBGENE00019904	149	257	11627	4.55449	0.0032673	0.000654315	0.00735122	GO:0006813~potassium ion transport
GOTERM_BP_ALL	GO:0015672~monovalent inorganic cation transport	12	5.08475	0.000245215	WBGENE00006664, WBGENE00012137, WBGENE00014261, WBGENE00015333, WBGENE00013333, WBGENE00002233, WBGENE00008570, WBGENE00006693, WBGENE00010278, WBGENE00019904, WBGENE00006669, WBGENE00001374	149	240	11627	3.90168	0.1509	0.0135391	0.366779	GO:0006813~potassium ion transport
GOTERM_BP_ALL	GO:0098662~inorganic cation transmembrane transport	12	5.08475	0.000796726	WBGENE00006664, WBGENE00012137, WBGENE00014261, WBGENE00013333, WBGENE00002233, WBGENE00044107, WBGENE00008570, WBGENE00006693, WBGENE00010278, WBGENE00019904, WBGENE00006669, WBGENE00001374	149	276	11627	3.39276	0.412352	0.0326808	1.18712	GO:0071805~potassium ion transmembrane transport
GOTERM_BP_ALL	GO:0071805~potassium ion transmembrane transport	8	3.38983	0.000108968	WBGENE00006664, WBGENE00014261, WBGENE00002233, WBGENE00008570, WBGENE00006693, WBGENE00019904, WBGENE00006669, WBGENE00001374	149	86	11627	7.25894	0.0701067	0.0103299	0.163143
GOTERM_BP_ALL	GO:0052696~flavonoid glucuronidation	7	2.9661	0.00027863	WBGENE00007073, WBGENE00007072, WBGENE00015369, WBGENE00011452, WBGENE00008097, WBGENE00010904, WBGENE00007455	149	71	11627	7.69345	0.16962	0.0141961	0.416662
GOTERM_MF_ALL	GO:0005215~transporter activity	31	13.1356	4.80038e-05	WBGENE00001586, WBGENE00004997, WBGENE00012137, WBGENE00018429, WBGENE00002233, WBGENE00017389, WBGENE00006669, WBGENE00000061, WBGENE00009799, WBGENE00001616, WBGENE00015333, WBGENE00013088, WBGENE00002260, WBGENE00000177, WBGENE00001612, WBGENE00006809, WBGENE00020004, WBGENE00000046, WBGENE00006693, WBGENE00001374, WBGENE00009686, WBGENE00006664, WBGENE00000232, WBGENE00014261, WBGENE00013333,…	139	970	9479	2.1794	0.0125933	0.000904827	0.0628776
GOTERM_MF_ALL	GO:0022857~transmembrane transporter activity	29	12.2881	1.45876e-05	WBGENE00001586, WBGENE00004997, WBGENE00012137, WBGENE00018429, WBGENE00002233, WBGENE00017389, WBGENE00006669, WBGENE00000061, WBGENE00009799, WBGENE00001616, WBGENE00015333, WBGENE00013088, WBGENE00000177, WBGENE00001612, WBGENE00006809, WBGENE00000046, WBGENE00006693, WBGENE00001374, WBGENE00009686, WBGENE00006664, WBGENE00000232, WBGENE00014261, WBGENE00013333, WBGENE00044107, WBGENE00008570,…	139	818	9479	2.41764	0.00384374	0.000320877	0.0191113
GOTERM_MF_ALL	GO:0099600~transmembrane receptor activity	28	11.8644	0.000466673	WBGENE00001586, WBGENE00022605, WBGENE00020069, WBGENE00017389, WBGENE00010979, WBGENE00009799, WBGENE00009965, WBGENE00000061, WBGENE00001616, WBGENE00015409, WBGENE00005771, WBGENE00006207, WBGENE00017880, WBGENE00019262, WBGENE00001612, WBGENE00006224, WBGENE00007635, WBGENE00006202, WBGENE00011197, WBGENE00000046, WBGENE00012055, WBGENE00006167, WBGENE00003232, WBGENE00001374, WBGENE00015080,…	139	947	9479	2.0163	0.11594	0.00682275	0.609724
GOTERM_MF_ALL	GO:0016491~oxidoreductase activity	24	10.1695	6.91799e-06	WBGENE00044811, WBGENE00000372, WBGENE00008519, WBGENE00012914, WBGENE00008167, WBGENE00019473, WBGENE00012448, WBGENE00018334, WBGENE00012407, WBGENE00015044, WBGENE00001500, WBGENE00019846, WBGENE00018393, WBGENE00011699, WBGENE00011673, WBGENE00011495, WBGENE00020154, WBGENE00010706, WBGENE00011671, WBGENE00011672, WBGENE00009110, WBGENE00022076, WBGENE00014254, WBGENE00011009	139	569	9479	2.87638	0.00182469	0.000182619	0.00906376
GOTERM_MF_ALL	GO:0022891~substrate-specific transmembrane transporter activity	24	10.1695	6.68138e-05	WBGENE00001586, WBGENE00006809, WBGENE00012137, WBGENE00002233, WBGENE00000046, WBGENE00006693, WBGENE00017389, WBGENE00006669, WBGENE00009799, WBGENE00001374, WBGENE00000061, WBGENE00009686, WBGENE00001616, WBGENE00006664, WBGENE00014261, WBGENE00000232, WBGENE00013333, WBGENE00044107, WBGENE00008570, WBGENE00015288, WBGENE00000177, WBGENE00010278, WBGENE00019904, WBGENE00001612	139	656	9479	2.49491	0.0174848	0.00117527	0.0875059
GOTERM_MF_ALL	GO:0004888~transmembrane signaling receptor activity	24	10.1695	0.00382861	WBGENE00006224, WBGENE00007635, WBGENE00022605, WBGENE00006202, WBGENE00011197, WBGENE00000046, WBGENE00020069, WBGENE00012055, WBGENE00006167, WBGENE00017389, WBGENE00010979, WBGENE00003232, WBGENE00009965, WBGENE00015080, WBGENE00000061, WBGENE00001616, WBGENE00015409, WBGENE00005771, WBGENE00005591, WBGENE00008250, WBGENE00006207, WBGENE00017880, WBGENE00019262, WBGENE00001612	139	877	9479	1.86621	0.636761	0.0343178	4.90176
GOTERM_MF_ALL	GO:0015267~channel activity	23	9.74576	1.00399e-08	WBGENE00001586, WBGENE00006809, WBGENE00004997, WBGENE00012137, WBGENE00002233, WBGENE00000046, WBGENE00006693, WBGENE00017389, WBGENE00006669, WBGENE00009799, WBGENE00001374, WBGENE00000061, WBGENE00001616, WBGENE00006664, WBGENE00014261, WBGENE00000232, WBGENE00013333, WBGENE00008570, WBGENE00015288, WBGENE00000177, WBGENE00010278, WBGENE00019904, WBGENE00001612	139	361	9479	4.34479	2.65052e-06	8.83507e-07	1.31545e-05
GOTERM_MF_ALL	GO:0022838~substrate-specific channel activity	22	9.32203	9.0058e-09	WBGENE00001586, WBGENE00006809, WBGENE00012137, WBGENE00002233, WBGENE00000046, WBGENE00006693, WBGENE00017389, WBGENE00006669, WBGENE00009799, WBGENE00001374, WBGENE00000061, WBGENE00001616, WBGENE00006664, WBGENE00000232, WBGENE00014261, WBGENE00013333, WBGENE00008570, WBGENE00015288, WBGENE00000177, WBGENE00010278, WBGENE00019904, WBGENE00001612	139	327	9479	4.58799	2.37753e-06	1.18877e-06	1.17996e-05
GOTERM_MF_ALL	GO:0015075~ion transmembrane transporter activity	22	9.32203	3.62639e-05	WBGENE00001586, WBGENE00006809, WBGENE00012137, WBGENE00002233, WBGENE00000046, WBGENE00006693, WBGENE00017389, WBGENE00006669, WBGENE00009799, WBGENE00001374, WBGENE00000061, WBGENE00001616, WBGENE00006664, WBGENE00000232, WBGENE00014261, WBGENE00013333, WBGENE00044107, WBGENE00008570, WBGENE00015288, WBGENE00010278, WBGENE00019904, WBGENE00001612	139	544	9479	2.75786	0.00952817	0.000736179	0.0475036
GOTERM_MF_ALL	GO:0005216~ion channel activity	21	8.89831	2.55882e-08	WBGENE00001586, WBGENE00006809, WBGENE00012137, WBGENE00002233, WBGENE00000046, WBGENE00006693, WBGENE00017389, WBGENE00006669, WBGENE00009799, WBGENE00001374, WBGENE00000061, WBGENE00001616, WBGENE00006664, WBGENE00000232, WBGENE00014261, WBGENE00013333, WBGENE00008570, WBGENE00015288, WBGENE00010278, WBGENE00019904, WBGENE00001612	139	315	9479	4.54628	6.75527e-06	1.35106e-06	3.35264e-05
GOTERM_MF_ALL	GO:0008324~cation transmembrane transporter activity	15	6.35593	0.00207006	WBGENE00006809, WBGENE00012137, WBGENE00002233, WBGENE00000046, WBGENE00006693, WBGENE00006669, WBGENE00000061, WBGENE00001374, WBGENE00006664, WBGENE00014261, WBGENE00013333, WBGENE00044107, WBGENE00008570, WBGENE00010278, WBGENE00019904	139	401	9479	2.55091	0.421353	0.0200577	2.67853
GOTERM_MF_ALL	GO:0004497~monooxygenase activity	14	5.9322	1.58798e-09	WBGENE00000372, WBGENE00008519, WBGENE00012914, WBGENE00019473, WBGENE00012448, WBGENE00018334, WBGENE00015044, WBGENE00011699, WBGENE00011673, WBGENE00011671, WBGENE00010706, WBGENE00011672, WBGENE00014254, WBGENE00011009	139	99	9479	9.64363	4.19227e-07	4.19227e-07	2.08062e-06
GOTERM_MF_ALL	GO:0005506~iron ion binding	14	5.9322	1.91871e-08	WBGENE00000372, WBGENE00008519, WBGENE00019473, WBGENE00012448, WBGENE00018334, WBGENE00015044, WBGENE00001500, WBGENE00011699, WBGENE00011673, WBGENE00011671, WBGENE00010706, WBGENE00011672, WBGENE00014254, WBGENE00011009	139	121	9479	7.89024	5.06537e-06	1.26635e-06	2.51394e-05
GOTERM_MF_ALL	GO:0005261~cation channel activity	14	5.9322	6.49222e-06	WBGENE00006809, WBGENE00012137, WBGENE00002233, WBGENE00000046, WBGENE00006693, WBGENE00006669, WBGENE00000061, WBGENE00001374, WBGENE00006664, WBGENE00014261, WBGENE00013333, WBGENE00008570, WBGENE00019904, WBGENE00010278	139	200	9479	4.7736	0.00171248	0.000190421	0.00850595
GOTERM_MF_ALL	GO:0016705~oxidoreductase activity, acting on paired donors, with incorporation or reduction of molecular oxygen	13	5.50847	4.06024e-07	WBGENE00000372, WBGENE00008519, WBGENE00019473, WBGENE00012448, WBGENE00018334, WBGENE00015044, WBGENE00011699, WBGENE00011673, WBGENE00010706, WBGENE00011671, WBGENE00011672, WBGENE00014254, WBGENE00011009	139	131	9479	6.76737	0.000107185	1.78649e-05	0.000531982
GOTERM_MF_ALL	GO:0020037~heme binding	13	5.50847	2.30356e-06	WBGENE00000372, WBGENE00008519, WBGENE00019473, WBGENE00012448, WBGENE00018334, WBGENE00015044, WBGENE00011699, WBGENE00011673, WBGENE00010706, WBGENE00011671, WBGENE00011672, WBGENE00014254, WBGENE00011009	139	154	9479	5.75666	0.000607957	8.68736e-05	0.00301815
GOTERM_MF_ALL	GO:0022836~gated channel activity	13	5.50847	1.36931e-05	WBGENE00001586, WBGENE00006809, WBGENE00002233, WBGENE00000046, WBGENE00017389, WBGENE00001374, WBGENE00000061, WBGENE00009799, WBGENE00001616, WBGENE00014261, WBGENE00000232, WBGENE00008570, WBGENE00001612	139	183	9479	4.8444	0.00360849	0.000328584	0.0179396
GOTERM_MF_ALL	GO:0046873~metal ion transmembrane transporter activity	12	5.08475	0.000740483	WBGENE00006664, WBGENE00012137, WBGENE00014261, WBGENE00013333, WBGENE00002233, WBGENE00044107, WBGENE00008570, WBGENE00006693, WBGENE00010278, WBGENE00019904, WBGENE00006669, WBGENE00001374	139	240	9479	3.40971	0.177626	0.0088497	0.965866
GOTERM_MF_ALL	GO:0015077~monovalent inorganic cation transmembrane transporter activity	11	4.66102	0.0015714	WBGENE00006664, WBGENE00012137, WBGENE00014261, WBGENE00013333, WBGENE00002233, WBGENE00008570, WBGENE00006693, WBGENE00010278, WBGENE00019904, WBGENE00006669, WBGENE00001374	139	224	9479	3.34882	0.339777	0.0158415	2.03943
GOTERM_MF_ALL	GO:0015276~ligand-gated ion channel activity	9	3.81356	0.000633478	WBGENE00001586, WBGENE00001616, WBGENE00000232, WBGENE00000046, WBGENE00017389, WBGENE00001612, WBGENE00009799, WBGENE00000061, WBGENE00001374	139	131	9479	4.6851	0.154047	0.00832968	0.826826
GOTERM_MF_ALL	GO:0015079~potassium ion transmembrane transporter activity	8	3.38983	0.000325259	WBGENE00006664, WBGENE00014261, WBGENE00002233, WBGENE00008570, WBGENE00006693, WBGENE00019904, WBGENE00006669, WBGENE00001374	139	90	9479	6.06171	0.0822977	0.00503916	0.425325
GOTERM_MF_ALL	GO:0005230~extracellular ligand-gated ion channel activity	8	3.38983	0.00141201	WBGENE00001586, WBGENE00001616, WBGENE00000232, WBGENE00000046, WBGENE00017389, WBGENE00001612, WBGENE00009799, WBGENE00000061	139	115	9479	4.74395	0.311359	0.0148106	1.83433
GOTERM_MF_ALL	GO:0015020~glucuronosyltransferase activity	7	2.9661	0.000702342	WBGENE00007073, WBGENE00007072, WBGENE00015369, WBGENE00011452, WBGENE00008097, WBGENE00010904, WBGENE00007455	139	74	9479	6.45081	0.169297	0.00879365	0.916326
GOTERM_MF_ALL	GO:0005231~excitatory extracellular ligand-gated ion channel activity	6	2.54237	0.00491366	WBGENE00001586, WBGENE00001616, WBGENE00000232, WBGENE00000046, WBGENE00001612, WBGENE00000061	139	76	9479	5.38376	0.727578	0.0410808	6.25002
GOTERM_MF_ALL	GO:0008395~steroid hydroxylase activity	5	2.11864	0.00216249	WBGENE00011699, WBGENE00019473, WBGENE00012448, WBGENE00018334, WBGENE00015044	139	38	9479	8.97293	0.43533	0.0202043	2.79657
GOTERM_MF_ALL	GO:0005234~extracellular-glutamate-gated ion channel activity	4	1.69492	0.00549265	WBGENE00001586, WBGENE00001616, WBGENE00000232, WBGENE00001612	139	25	9479	10.9111	0.766379	0.0444224	6.96222
GOTERM_CC_ALL	GO:0016020~membrane	104	44.0678	4.18941e-07	WBGENE00013539, WBGENE00015369, WBGENE00021123, WBGENE00001540, WBGENE00001547, WBGENE00010979, WBGENE00009965, WBGENE00016716, WBGENE00005771, WBGENE00010904, WBGENE00016150, WBGENE00017880, WBGENE00000177, WBGENE00014254, WBGENE00007635, WBGENE00011362, WBGENE00022469, WBGENE00005484, WBGENE00000402, WBGENE00003232, WBGENE00007753, WBGENE00004020, WBGENE00044107, WBGENE00008570, WBGENE00010278,…	129	6798	11373	1.34877	6.03257e-05	1.50818e-05	0.000496749	GO:0044425~membrane part
GOTERM_CC_ALL	GO:0044425~membrane part	102	43.2203	1.30873e-07	WBGENE00013539, WBGENE00001586, WBGENE00007073, WBGENE00007072, WBGENE00022605, WBGENE00015369, WBGENE00021123, WBGENE00012448, WBGENE00018429, WBGENE00001540, WBGENE00001547, WBGENE00017389, WBGENE00010979, WBGENE00009965, WBGENE00006669, WBGENE00009799, WBGENE00016716, WBGENE00005771, WBGENE00015333, WBGENE00016150, WBGENE00010904, WBGENE00006207, WBGENE00017880, WBGENE00000177, WBGENE00014254,…	129	6477	11373	1.38839	1.88456e-05	6.2819e-06	0.00015518	GO:0044459~plasma membrane part, GO:0016021~integral component of membrane, GO:0031224~intrinsic component of membrane
GOTERM_CC_ALL	GO:0016021~integral component of membrane	101	42.7966	5.74048e-09	WBGENE00013539, WBGENE00001586, WBGENE00007073, WBGENE00007072, WBGENE00022605, WBGENE00015369, WBGENE00021123, WBGENE00012448, WBGENE00018429, WBGENE00001540, WBGENE00001547, WBGENE00017389, WBGENE00010979, WBGENE00009965, WBGENE00006669, WBGENE00009799, WBGENE00016716, WBGENE00005771, WBGENE00015333, WBGENE00016150, WBGENE00010904, WBGENE00006207, WBGENE00017880, WBGENE00000177, WBGENE00014254,…	129	6088	11373	1.46262	8.26628e-07	8.26628e-07	6.80664e-06	GO:0005887~integral component of plasma membrane
GOTERM_CC_ALL	GO:0071944~cell periphery	34	14.4068	6.02529e-05	WBGENE00001586, WBGENE00002233, WBGENE00020649, WBGENE00001540, WBGENE00001547, WBGENE00017389, WBGENE00006669, WBGENE00000061, WBGENE00009799, WBGENE00001616, WBGENE00015409, WBGENE00006207, WBGENE00000177, WBGENE00001612, WBGENE00017039, WBGENE00006809, WBGENE00006224, WBGENE00001107, WBGENE00006202, WBGENE00008663, WBGENE00000046, WBGENE00006693, WBGENE00006167, WBGENE00000402, WBGENE00003232,…	129	1470	11373	2.03914	0.00863915	0.00144507	0.0714203	GO:0005886~plasma membrane
GOTERM_CC_ALL	GO:0044459~plasma membrane part	23	9.74576	0.0011518	WBGENE00017039, WBGENE00001586, WBGENE00006224, WBGENE00001107, WBGENE00006202, WBGENE00002233, WBGENE00020649, WBGENE00000046, WBGENE00006693, WBGENE00006167, WBGENE00003232, WBGENE00006669, WBGENE00001374, WBGENE00000061, WBGENE00001616, WBGENE00006664, WBGENE00015409, WBGENE00014261, WBGENE00005591, WBGENE00006207, WBGENE00015288, WBGENE00019904, WBGENE00001612	129	971	11373	2.08831	0.152916	0.0137344	1.35722	GO:0097060~synaptic membrane, GO:0031226~intrinsic component of plasma membrane
GOTERM_CC_ALL	GO:0005887~integral component of plasma membrane	20	8.47458	0.000547993	WBGENE00006224, WBGENE00001107, WBGENE00006202, WBGENE00002233, WBGENE00020649, WBGENE00000046, WBGENE00006693, WBGENE00006167, WBGENE00003232, WBGENE00006669, WBGENE00001374, WBGENE00000061, WBGENE00006664, WBGENE00015409, WBGENE00005591, WBGENE00014261, WBGENE00006207, WBGENE00015288, WBGENE00019904, WBGENE00001612	129	735	11373	2.39899	0.0758978	0.00981806	0.647841
GOTERM_CC_ALL	GO:0034702~ion channel complex	8	3.38983	0.000540603	WBGENE00001586, WBGENE00014261, WBGENE00002233, WBGENE00000046, WBGENE00015288, WBGENE00001612, WBGENE00000061, WBGENE00001374	129	126	11373	5.59764	0.0749134	0.0110623	0.639131
GOTERM_CC_ALL	GO:0097060~synaptic membrane	5	2.11864	0.00432088	WBGENE00001586, WBGENE00001616, WBGENE00000046, WBGENE00001612, WBGENE00003232	129	59	11373	7.47142	0.463964	0.0468336	5.0049

## Sheet: UnmappedDAVID
Unmapped IDs in DAVID for the up regulated genes
WBGene00013763
WBGene00021520
WBGene00007165
WBGene00015597
WBGene00020622
WBGene00015596
WBGene00012572
WBGene00044155
WBGene00009428
Unmapped ID in DAVID for the down regulated genes
WBGene00019117

## Sheet: TEA
TEA annotated IDs for the up regulated genes
WBGene00021580
WBGene00013119
WBGene00022570
WBGene00008988
WBGene00017705
WBGene00018725
WBGene00015596
WBGene00015598
WBGene00008631
WBGene00006237
WBGene00008850
WBGene00017586
WBGene00023423
WBGene00018646
WBGene00009957
WBGene00019659
WBGene00020759
WBGene00006533
WBGene00012572
WBGene00021520
WBGene00021979
WBGene00003702
WBGene00008810
WBGene00021002
WBGene00022656
WBGene00007097
WBGene00007165
WBGene00015455
WBGene00015574
WBGene00015602
WBGene00015597
WBGene00007506
WBGene00044457
WBGene00015994
WBGene00007717
WBGene00045411
WBGene00007726
WBGene00005833
WBGene00016121
WBGene00016124
WBGene00077525
WBGene00077593
WBGene00000795
WBGene00017093
WBGene00017120
WBGene00017199
WBGene00017270
WBGene00008577
WBGene00017467
WBGene00008900
WBGene00008944
WBGene00017595
WBGene00017596
WBGene00017612
WBGene00017708
WBGene00009225
WBGene00045457
WBGene00009428
WBGene00009433
WBGene00009465
WBGene00018385
WBGene00009778
WBGene00018586
WBGene00009898
WBGene00009914
WBGene00004095
WBGene00004129
WBGene00018817
WBGene00010086
WBGene00010125
WBGene00010128
WBGene00018933
WBGene00018971
WBGene00003650
WBGene00019132
WBGene00010417
WBGene00001743
WBGene00019533
WBGene00019531
WBGene00010658
WBGene00003844
WBGene00044458
WBGene00019660
WBGene00010814
WBGene00019735
WBGene00003713
WBGene00019744
WBGene00010920
WBGene00019859
WBGene00011142
WBGene00011330
WBGene00020220
WBGene00011494
WBGene00011626
WBGene00020579
WBGene00020580
WBGene00020622
WBGene00020774
WBGene00013763
WBGene00012450
WBGene00012451
WBGene00005141
WBGene00012556
WBGene00012583
WBGene00021464
WBGene00012733
WBGene00021565
WBGene00013036
WBGene00021755
WBGene00021809
WBGene00021871
WBGene00021977
WBGene00021978
WBGene00013432
WBGene00022067
WBGene00022083
WBGene00022096
WBGene00013507
WBGene00022224
WBGene00022289
WBGene00013559
WBGene00023483
WBGene00044155
WBGene00022327
WBGene00022329
WBGene00022346
WBGene00013837
WBGene00022847
WBGene00022848
WBGene00022873
WBGene00022671
WBGene00022674
WBGene00022752
WBGene00004176
WBGene00021671
WBGene00004053
TEA annotated IDs for the down regulated genes
WBGene00022656
WBGene00007072
WBGene00007073
WBGene00000491
WBGene00000232
WBGene00015044
WBGene00005149
WBGene00015288
WBGene00045386
WBGene00015333
WBGene00015369
WBGene00015398
WBGene00015403
WBGene00015409
WBGene00005093
WBGene00007310
WBGene00003402
WBGene00007345
WBGene00015517
WBGene00001612
WBGene00007450
WBGene00007453
WBGene00007455
WBGene00015632
WBGene00001586
WBGene00015756
WBGene00004193
WBGene00007635
WBGene00015887
WBGene00015897
WBGene00015953
WBGene00015984
WBGene00002233
WBGene00016107
WBGene00016109
WBGene00016150
WBGene00007753
WBGene00000490
WBGene00007758
WBGene00016172
WBGene00016454
WBGene00003591
WBGene00008051
WBGene00008064
WBGene00016670
WBGene00000402
WBGene00016716
WBGene00008167
WBGene00004401
WBGene00008208
WBGene00008250
WBGene00016891
WBGene00001500
WBGene00017039
WBGene00008408
WBGene00008436
WBGene00017092
WBGene00006207
WBGene00004020
WBGene00008516
WBGene00008519
WBGene00006306
WBGene00006167
WBGene00017200
WBGene00017226
WBGene00008570
WBGene00017301
WBGene00017320
WBGene00017364
WBGene00008663
WBGene00005484
WBGene00017379
WBGene00017389
WBGene00044811
WBGene00001374
WBGene00008731
WBGene00008834
WBGene00017493
WBGene00017514
WBGene00003099
WBGene00008953
WBGene00000242
WBGene00017762
WBGene00009096
WBGene00009110
WBGene00009183
WBGene00017880
WBGene00017881
WBGene00006061
WBGene00006693
WBGene00009601
WBGene00018334
WBGene00018361
WBGene00018375
WBGene00018393
WBGene00009677
WBGene00000784
WBGene00018429
WBGene00009730
WBGene00009768
WBGene00009777
WBGene00003544
WBGene00009799
WBGene00018544
WBGene00000061
WBGene00009883
WBGene00009958
WBGene00009965
WBGene00009967
WBGene00010215
WBGene00003094
WBGene00003095
WBGene00001107
WBGene00010238
WBGene00044107
WBGene00019089
WBGene00019105
WBGene00019117
WBGene00010335
WBGene00019262
WBGene00010456
WBGene00006669
WBGene00002118
WBGene00001454
WBGene00019376
WBGene00000177
WBGene00019473
WBGene00044510
WBGene00010706
WBGene00019618
WBGene00000862
WBGene00010864
WBGene00010947
WBGene00010904
WBGene00010979
WBGene00019846
WBGene00011020
WBGene00019904
WBGene00011070
WBGene00044514
WBGene00011184
WBGene00011291
WBGene00011197
WBGene00011217
WBGene00020004
WBGene00020069
WBGene00020154
WBGene00020156
WBGene00011364
WBGene00001547
WBGene00011452
WBGene00011486
WBGene00011495
WBGene00004987
WBGene00004989
WBGene00011630
WBGene00000046
WBGene00011644
WBGene00000372
WBGene00011672
WBGene00011673
WBGene00011699
WBGene00011733
WBGene00003754
WBGene00011798
WBGene00011824
WBGene00020573
WBGene00020649
WBGene00001182
WBGene00002260
WBGene00004997
WBGene00020792
WBGene00012137
WBGene00020938
WBGene00021028
WBGene00005652
WBGene00021123
WBGene00012424
WBGene00013778
WBGene00022469
WBGene00021232
WBGene00021337
WBGene00012538
WBGene00012631
WBGene00012633
WBGene00012753
WBGene00012914
WBGene00013088
WBGene00021876
WBGene00013368
WBGene00022076
WBGene00012407
WBGene00001616
WBGene00001540
WBGene00003232
WBGene00006664
WBGene00014254
WBGene00014261
WBGene00000212
WBGene00018488
WBGene00009857
WBGene00011622
WBGene00007044
WBGene00006809

## Sheet: UnannotatedTEA
TEA unannotated IDs for the up regulated genes
WBGene00015371
WBGene00015686
WBGene00044787
WBGene00017205
WBGene00008632
WBGene00017344
WBGene00017630
WBGene00009417
WBGene00009907
WBGene00018865
WBGene00010119
WBGene00010746
WBGene00019973
WBGene00020221
WBGene00020700
WBGene00012788
WBGene00045415
WBGene00044402
WBGene00022871
WBGene00004177
WBGene00004149
TEA unannotated IDs for the down regulated genes
WBGene00015080
WBGene00007240
WBGene00015706
WBGene00015985
WBGene00005771
WBGene00008073
WBGene00008097
WBGene00005415
WBGene00018025
WBGene00009686
WBGene00018859
WBGene00010278
WBGene00010380
WBGene00010559
WBGene00000287
WBGene00010940
WBGene00011009
WBGene00019961
WBGene00011362
WBGene00011671
WBGene00006224
WBGene00012041
WBGene00012055
WBGene00012448
WBGene00012883
WBGene00021581
WBGene00021587
WBGene00013333
WBGene00013539
WBGene00006202
WBGene00044372
WBGene00022605
WBGene00005591
